# Supplementary material for: A quest for ideal electric field-driven MX@C70 endohedral fullerene memristors: which MX fits the best?
Source: Royal Society of Chemistry journal article supplement (doi:10.1039/d3cp01149f), 2023-01-01
Supplement: d3cp01149f1.pdf [file d3cp01149f1.pdf]

## ELECTRONIC SUPPLEMENTARY INFORMATION

### A Quest for Ideal Electric Field-Driven MX@C<sub>70</sub> Endohedral Fullerene Memristors: Which MX Fits the Best?

Lucie Tučková,<sup>1,2</sup> Adam Jaroš,<sup>1,3</sup> Cina Foroutan-Nejad,<sup>1,4\*</sup> Michal Straka<sup>1\*</sup>

<sup>1</sup>*Institute of Organic Chemistry and Biochemistry of the Czech Academy of Sciences, Flemingovo nám. 2, CZ–16610, Prague, Czech Republic*

<sup>2</sup>*Faculty of Chemical Engineering, University of Chemistry and Technology Prague, Technická 3, CZ–16628, Prague, Czech Republic*

<sup>3</sup>*Faculty of Science, Charles University, Albertov 2038/6, CZ–12843, Prague, Czech Republic*

<sup>4</sup>*Institute of Organic Chemistry, Polish Academy of Sciences, Kasprzaka 44/52, 01-224, Warsaw, Poland*

#### Stability of endo- versus endo-exofullerene NaClC<sub>70</sub>

The system with the molecular formula of NaClC<sub>70</sub> was optimized in the endofullerene NaCl@C<sub>70</sub> geometry and several endo-exofullerene Na@C<sub>70</sub>-Cl isomers as shown in **Figure S1**. The relative energies of the geometries optimized at the PBE0-D3/def2-SVP level are listed in **Table S1**. The effect of stabilization of the Na@C<sub>70</sub>-Cl species via charge transfer between the metal and the cage proposed by a referee does not take place, as the endohedral species is found to be more stable by at least 44.6 kcal/mol.

**Table S1:** Energies of different NaClC<sub>70</sub> isomers optimized at the PBE0-D3/def2-SVP level relative to the lowest energy found ( $\Delta E$  in kcal/mol).

| isomer                               | $\Delta E$ |
|--------------------------------------|------------|
| NaCl@C <sub>70</sub>                 | 0.0        |
| Na@C <sub>70</sub> -Cl( $\alpha$ )   | 44.6       |
| Na@C <sub>70</sub> -Cl( $\beta$ )    | 50.2       |
| Na@C <sub>70</sub> -Cl( $\gamma$ )   | 47.4       |
| Na@C <sub>70</sub> -Cl( $\delta$ )   | 47.5       |
| Na@C <sub>70</sub> -Cl( $\epsilon$ ) | 57.1       |

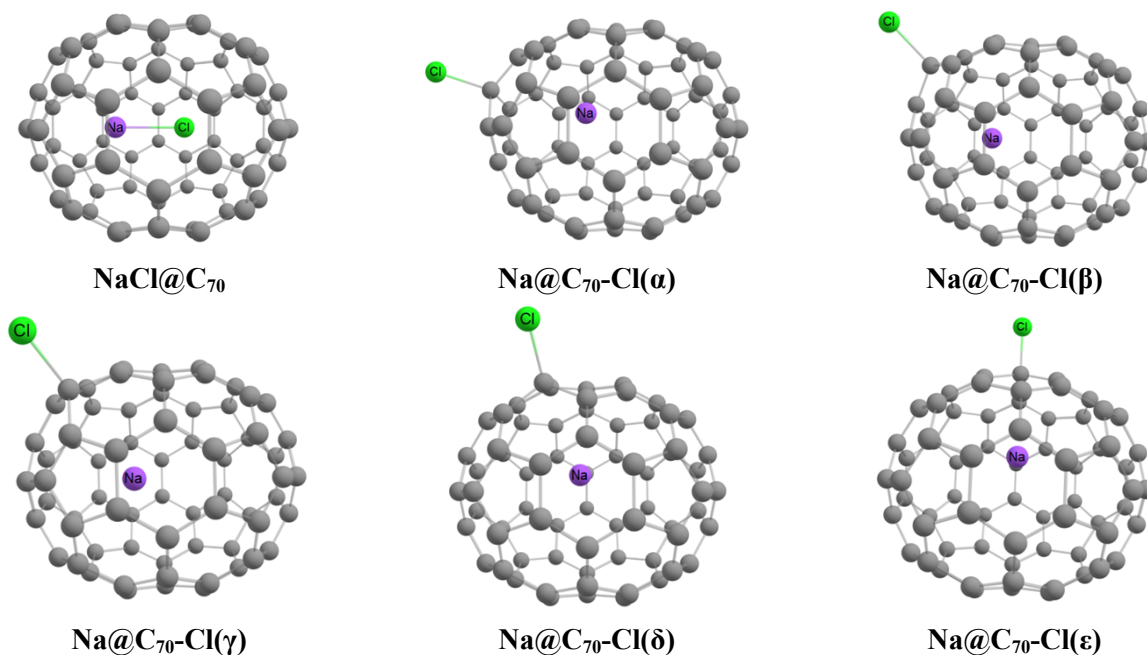

**Figure S1:** Optimized structures of different  $\text{NaClC}_{70}$  isomers.

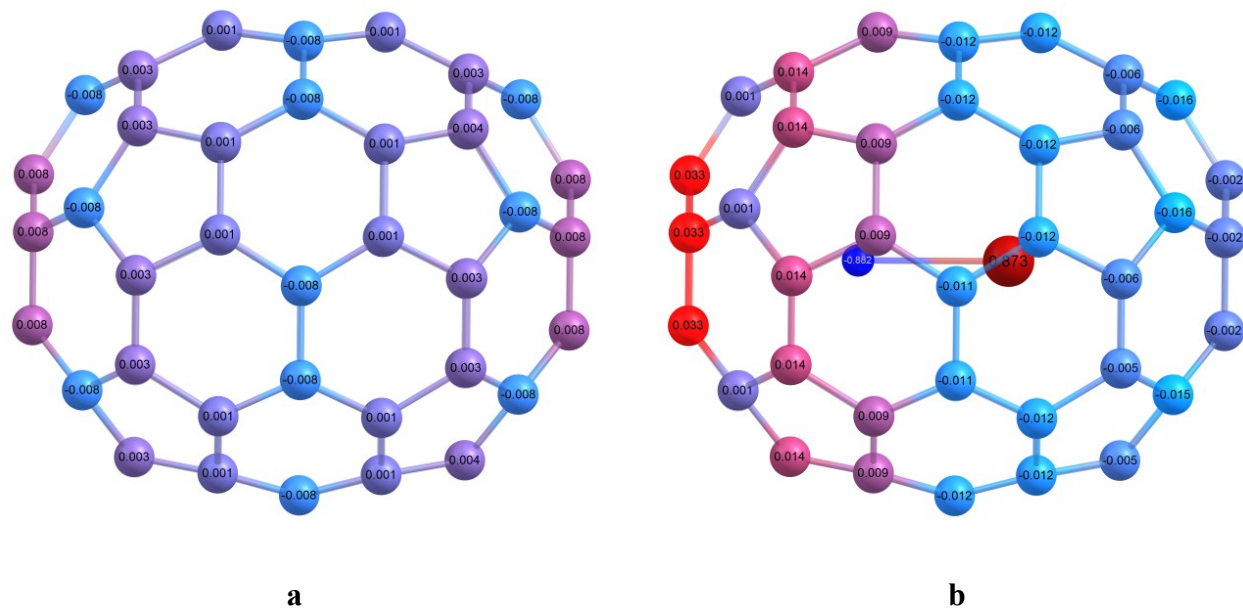

**Figure S2:** Charges obtained from natural population analysis (NPA) of (a)  $\text{C}_{70}$  and (b)  $\text{KF@C}_{70}$  systems.

### Basis set convergence at the *ab initio* level

Table S1 reveals fast convergence of ISB with the basis set, within 1 kcal/mol already with the def2-TZVP basis set. The larger def2-QZVP basis set only presents a marginal improvement. Hence, the def2-TZVP basis set can be considered as converged for the calculations of the

intrinsic switching barrier in  $\text{MX}@C_n$  systems. Note that even the small def2-SVP basis set already provides barriers within 1–2 kcal/mol from the largest def2-QZVP basis set. The fast convergence can be easily understood – here we subtract energies of two rather similar systems (LM and TS) of a particular molecule which means significant error cancellation for any level applied. For the same reason, it is not necessary to apply the complete basis set (CBS) extrapolation.

The basis set convergence of SCS-MP2 encapsulation energy (**Table S2**) is not as smooth as for ISB, particularly when the BSSE is omitted. Even with the BSSE (counterpoise) correction included in  $EE_{\text{BSSE}}$ , results are not satisfactorily converged. Hence, we employed Helgaker’s extrapolation formula(1) for the calculation of the energies at the CBS limit. The absolute difference between the BSSE-corrected and uncorrected EEs for the various basis sets is then between 22–43 kcal/mol for def2-SVP, 7–18 kcal/mol for def2-TZVP, 3–12 kcal/mol for def2-QZVP, and 0.1–9 kcal/mol for the CBS.

**Table S2:** Switching barriers (in kcal/mol) of the test set  $\text{MX}@C_{70}$  systems calculated using SCS-MP2 and different basis sets. The molecular geometries were optimized at the B97D3/def2-SVP level; the def2-QZVPP cbas auxiliary basis set was used for Zn and Cu atoms.

| MX →      | KF   | CsF  | LiCl | CuCl | ZnS |
|-----------|------|------|------|------|-----|
| def2-SVP  | 13.9 | 41.7 | 0.1  | 2.1  | 4.6 |
| def2-TZVP | 10.9 | 42.2 | -1.2 | 1.5  | 2.8 |
| def2-QZVP | 10.0 | 41.6 | -1.2 | 1.0  | 1.9 |

**Table S3:** Encapsulation energies (in kcal/mol) of the test set  $\text{MX}@C_{70}$  systems calculated using SCS-MP2 with different basis sets and the complete basis set extrapolation (CBS). The molecular geometries were optimized at the B97D3/def2-SVP level; the def2-QZVPP cbas auxiliary basis set was used for Zn and Cu atoms. BSSE-uncorrected values are in columns denoted as un., corrected values are in columns denoted as corr.

| MX →      | KF    |       | CsF   |       | LiCl  |       | CuCl  |       | ZnS   |       |
|-----------|-------|-------|-------|-------|-------|-------|-------|-------|-------|-------|
|           | un.   | corr. |
| def2-SVP  | -51.2 | -16.2 | -55.9 | -14.5 | -39.7 | -17.3 | -58.9 | -16.0 | -63.4 | -21.1 |
| def2-TZVP | -31.8 | -23.5 | -45.1 | -26.8 | -34.8 | -28.0 | -46.4 | -30.3 | -54.8 | -39.3 |
| def2-QZVP | -33.1 | -25.5 | -43.5 | -31.0 | -33.0 | -29.9 | -40.7 | -34.6 | -49.2 | -43.4 |
| CBS       | -35.2 | -27.1 | -42.6 | -33.8 | -32.3 | -31.0 | -38.2 | -37.7 | -45.9 | -46.0 |

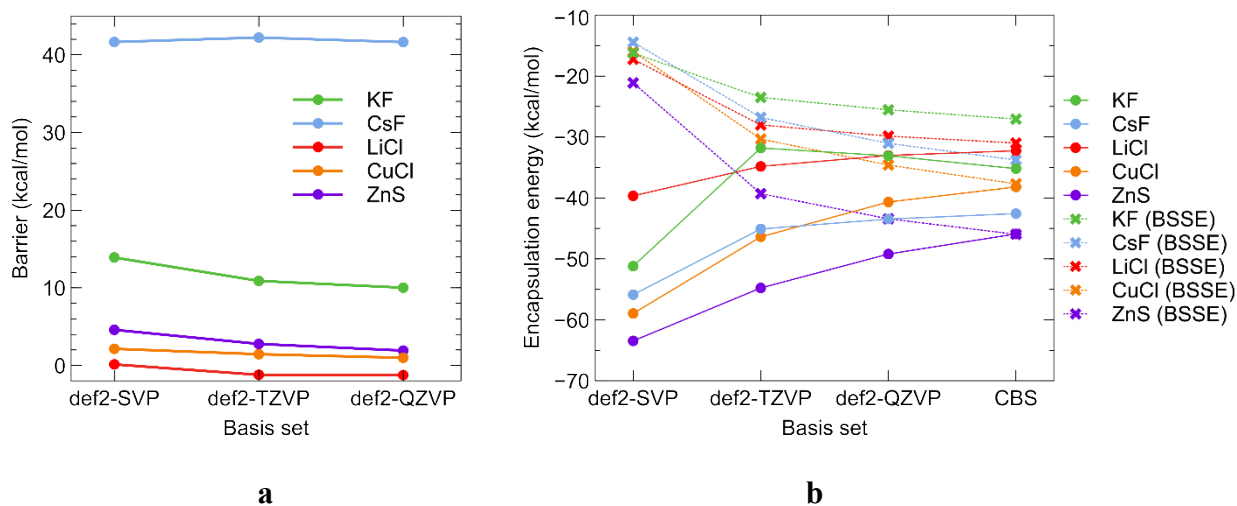

**Figure S3:** (a) Basis set convergence for the intrinsic switching barrier of the test set  $\text{MX}@C_{70}$  systems calculated using the SCS-MP2 method; (b) basis set convergence of the encapsulation energy with and without the BSSE correction calculated using the SCS-MP2 method. The complete basis set extrapolation (CBS) results are shown for encapsulation energy in (b).

**Table S4:** The intrinsic switching barrier (in kcal/mol) of the test set  $\text{MX}@C_{70}$  compounds calculated at different levels using the PBE0-D3/def2-SVP optimized structures. The RMSE was calculated using the DLPNO-CCSD(T) values as the reference.

| MX →                    | KF   | CsF  | LiCl | CuCl | ZnS | RMSE |
|-------------------------|------|------|------|------|-----|------|
| SCS-MP2/def2-TZVP       | 19.0 | 42.2 | 2.4  | 1.0  | 3.4 | 1.7  |
| DLPNO-CCSD(T)/def2-TZVP | 19.9 | 43.6 | 1.8  | 4.0  | 4.8 | –    |
| PBE0/def2-SVP           | 18.2 | 38.8 | 3.3  | 5.2  | 6.8 | 2.6  |
| PBE0 /def2-TZVP         | 18.5 | 38.9 | 2.0  | 2.9  | 4.3 | 2.3  |

**Table S5:** The intrinsic switching barrier (in kcal/mol) of the test set  $\text{MX}@C_{70}$  compounds calculated at different DFT-D3 levels employing structures optimized at the appertaining levels.

| MX →            | KF   | CsF  | LiCl | CuCl | ZnS  |
|-----------------|------|------|------|------|------|
| B97D3/def2-SVP  | 16.6 | 33.3 | 10.4 | 9.3  | 11.8 |
| B97D3/def2-TZVP | 15.2 | 34.5 | 8.6  | 7.8  | 10.3 |
| B97D3/def2-QZVP | 14.8 | 33.8 | 8.7  | 7.9  | 10.2 |
| TPSS/def2-SVP   | 17.0 | 35.5 | 3.4  | 1.3  | 6.9  |
| TPSS/def2-TZVP  | 16.5 | 35.1 | 1.8  | -0.8 | 4.6  |
| TPSS/def2-QZVP  | 16.2 | 34.5 | 1.8  | -1.1 | 4.4  |

**Table S6:** The encapsulation energies (in kcal/mol) of the test set MX@C<sub>70</sub> compounds calculated at different DFT-D3 levels. Calculated using structures of MX@C<sub>70</sub> and the free MX and C<sub>70</sub> optimized at the appertaining levels.

| MX →            | KF    | CsF   | LiCl  | CuCl  | ZnS   |
|-----------------|-------|-------|-------|-------|-------|
| B97D3/def2-SVP  | -20.6 | 26.5  | -45.7 | -60.0 | -56.2 |
| B97D3/def2-TZVP | -2.5  | 41.4  | -35.6 | -41.3 | -37.2 |
| B97D3/def2-QZVP | 0.0   | 41.6  | -34.0 | -37.9 | -35.5 |
| TPSS/def2-SVP   | -42.5 | -27.0 | -40.5 | -57.6 | -59.3 |
| TPSS/def2-TZVP  | -25.5 | -10.2 | -29.5 | -37.1 | -37.7 |
| TPSS/def2-QZVP  | -23.1 | -10.2 | -28.3 | -33.5 | -36.0 |

**Table S7:** The basis set superposition error (BSSE)-corrected encapsulation energies (in kcal/mol) of the test set MX@C<sub>70</sub> compounds calculated using the two DFT-D3 functionals. Calculated using structures of MX@C<sub>70</sub> optimized at the DFT-D3/def2-SVP level.

| MX →            | KF    | CsF   | LiCl  | CuCl  | ZnS   |
|-----------------|-------|-------|-------|-------|-------|
| B97D3/def2-SVP  | -2.2  | 43.5  | -34.2 | -35.9 | -33.5 |
| B97D3/def2-TZVP | -2.8  | 43.9  | -34.2 | -37.2 | -35.0 |
| B97D3/def2-QZVP | -3.1  | 42.4  | -34.7 | -37.9 | -36.1 |
| TPSS/def2-SVP   | -22.9 | -10.1 | -29.1 | -33.0 | -35.3 |
| TPSS/def2-TZVP  | -22.7 | -8.2  | -28.4 | -33.2 | -35.4 |
| TPSS/def2-QZVP  | -22.9 | -9.4  | -28.8 | -33.4 | -36.2 |

**Table S8:** The encapsulation energies (in kcal/mol) of the test set MX@C<sub>70</sub> compounds calculated at different DFT-D3 levels using the def2-TZVP basis set; SVP denotes the geometries optimized at the DFT-D3/def2-SVP level and TZVP denotes the geometries optimized at the DFT-D3/def2-TZVP level.

| MX →  | KF    |       | CsF   |       | LiCl  |       | CuCl  |       | ZnS   |       |
|-------|-------|-------|-------|-------|-------|-------|-------|-------|-------|-------|
|       | SVP   | TZVP  |
| B97D3 | -2.7  | -2.5  | 41.5  | 41.4  | -35.7 | -35.6 | -41.5 | -41.3 | -37.5 | -37.2 |
| TPSS  | -25.7 | -25.5 | -10.1 | -10.2 | -30.1 | -29.5 | -37.2 | -37.1 | -37.9 | -37.7 |

**Table S9:** Root-mean-square differences of atomic positions (RMSDs in Å) of the test set MX@C<sub>70</sub> systems LM and TS structures optimized using two DFT-D3 functionals and the def2-SVP basis set with respect to the geometries optimized at the DFT-D3/def2-TZVP level.

| MX →  | KF    |       | CsF   |       | LiCl  |       | CuCl  |       | ZnS   |       |
|-------|-------|-------|-------|-------|-------|-------|-------|-------|-------|-------|
|       | LM    | TS    |
| B97D3 | 0.024 | 0.018 | 0.018 | 0.024 | 0.017 | 0.023 | 0.016 | 0.016 | 0.016 | 0.016 |
| TPSS  | 0.025 | 0.018 | 0.018 | 0.018 | 0.136 | 0.021 | 0.017 | 0.016 | 0.016 | 0.016 |

**Table S10:** SCS-MP2/def2-TZVP single-point energies (in kcal/mol) of DFT-D3/def2-SVP-optimized geometries relative to the energies of the SCS-MP2/def2-TZVP-optimized geometries.

| MX →    | KF   |      | CsF  |      | LiCl |      | CuCl |      | ZnS  |      |
|---------|------|------|------|------|------|------|------|------|------|------|
|         | LM   | TS   |
| SCS-MP2 | 0.0  | 0.0  | 0.0  | 0.0  | 0.0  | 0.0  | 0.0  | 0.0  | 0.0  | 0.0  |
| PBE0    | 3.2  | 1.8  | 1.8  | 1.7  | 1.8  | 1.5  | 1.9  | 1.5  | 1.8  | 1.7  |
| M06     | 3.5  | 2.1  | 1.7  | 1.6  | 1.8  | 1.6  | 1.7  | 1.7  | 2.0  | 1.8  |
| TPSSh   | 5.0  | 2.1  | 2.1  | 2.1  | 3.5  | 1.5  | 1.8  | 1.4  | 1.8  | 1.7  |
| B3LYP   | 6.9  | 3.0  | 3.8  | 3.3  | 4.6  | 2.4  | 4.2  | 2.7  | 4.3  | 3.0  |
| TPSS    | 7.8  | 4.4  | 4.5  | 4.8  | 3.7  | 3.6  | 3.6  | 3.9  | 3.9  | 3.9  |
| PBE     | 6.8  | 5.3  | 5.8  | 5.9  | 5.2  | 4.7  | 4.9  | 5.2  | 5.2  | 5.2  |
| ωB97X   | 6.7  | 5.9  | 5.7  | 6.0  | 7.0  | 5.5  | 6.6  | 5.9  | 6.8  | 6.2  |
| BHLYP   | 8.0  | 6.1  | 6.3  | 5.7  | 7.1  | 5.7  | 6.8  | 6.2  | 6.7  | 5.9  |
| B97D3   | 18.0 | 8.4  | 8.7  | 8.7  | 10.9 | 7.0  | 7.4  | 7.5  | 8.6  | 7.9  |
| BLYP    | 20.2 | 13.8 | 15.5 | 15.3 | 14.7 | 12.1 | 14.4 | 12.8 | 14.7 | 13.3 |

In the following tables, the functionals were sorted by the value of the root-mean-square error (RMSE) which was calculated according to the following formula:

$$RMSE = \sqrt{\frac{\sum_N (R_{DFT} - R_{MP2})^2}{N}}$$

where  $R_{DFT}$  is the observed parameter from the DFT-optimized geometries,  $R_{MP2}$  is the same parameter from the reference SCS-MP2-optimized geometries, and  $N$  is the number of molecules.

**Table S11:** M–X bond length (in pm) of the test set MX@C<sub>70</sub> systems LM structures optimized using various DFT-D3 functionals with the def2-SVP basis set, and the reference SCS-MP2/def2-TZVP method.

| MX →           | KF           | CsF          | LiCl         | CuCl         | ZnS          | RMSE |
|----------------|--------------|--------------|--------------|--------------|--------------|------|
| <b>SCS-MP2</b> | <b>232.5</b> | <b>246.8</b> | <b>213.4</b> | <b>212.5</b> | <b>209.3</b> |      |
| M06            | 224.1        | 243.9        | 210.7        | 213.1        | 206.6        | 4.3  |
| PBE            | 223.6        | 243.0        | 210.3        | 212.5        | 207.5        | 4.6  |
| ωB97X          | 223.6        | 242.7        | 209.4        | 211.6        | 205.1        | 5.1  |
| PBE0           | 222.8        | 242.1        | 209.4        | 212.5        | 206.9        | 5.3  |
| TPSS           | 221.5        | 243.6        | 209.2        | 212.4        | 207.4        | 5.5  |
| TPSSh          | 221.5        | 242.9        | 209.1        | 212.4        | 207.2        | 5.6  |
| BHLYP          | 220.7        | 240.0        | 207.4        | 212.8        | 206.0        | 6.8  |
| B3LYP          | 219.4        | 240.6        | 206.5        | 211.1        | 206.3        | 7.3  |
| BLYP           | 218.5        | 241.4        | 205.9        | 210.2        | 206.7        | 7.7  |
| B97D3          | 217.2        | 241.8        | 206.5        | 212.1        | 207.0        | 7.9  |

**Table S12:** Distance (in pm) of the uttermost pentagons of the fullerene (longest C–C distance) of the test set MX@C<sub>70</sub> systems LM structures and the empty C<sub>70</sub> optimized using various DFT-D3 functionals with the def2-SVP basis set, and the reference SCS-MP2/def2-TZVP method.

| MX →           | KF           | CsF          | LiCl         | CuCl         | ZnS          | C <sub>70</sub> | RMSE |
|----------------|--------------|--------------|--------------|--------------|--------------|-----------------|------|
| <b>SCS-MP2</b> | <b>792.5</b> | <b>794.9</b> | <b>790.9</b> | <b>790.9</b> | <b>789.4</b> | <b>791.8</b>    |      |
| M06            | 793.1        | 794.8        | 792.0        | 790.3        | 790.4        | 792.0           | 0.8  |
| PBE0           | 793.1        | 795.0        | 791.6        | 791.9        | 791.2        | 792.2           | 1.0  |
| BHLYP          | 791.7        | 793.4        | 790.1        | 791.0        | 790.2        | 790.4           | 1.1  |
| TPSSh          | 796.0        | 797.2        | 794.5        | 794.0        | 793.6        | 794.6           | 3.6  |
| ωB97X          | 795.9        | 798.1        | 795.2        | 795.2        | 794.6        | 795.2           | 4.4  |
| B3LYP          | 797.1        | 798.3        | 795.0        | 795.4        | 795.0        | 795.1           | 4.7  |
| TPSS           | 798.0        | 799.1        | 796.1        | 795.4        | 795.5        | 796.5           | 5.6  |
| PBE            | 798.0        | 799.9        | 796.5        | 795.5        | 796.0        | 797.1           | 6.0  |
| B97D3          | 800.7        | 800.8        | 799.2        | 798.2        | 798.2        | 797.8           | 8.2  |
| BLYP           | 802.8        | 803.4        | 800.3        | 800.4        | 800.1        | 800.2           | 10.4 |

**Table S13:** Root-mean-square differences of atomic positions (RMSDs in Å) of the test set MX@C<sub>70</sub> systems LM structures and the empty C<sub>70</sub> geometries optimized using various DFT-D3 functionals with the def2-SVP basis set with respect to the LM geometries optimized at the reference SCS-MP2/def2-TZVP level. The functionals are sorted by the sum of all the RMSD values obtained for each functional from the lowest to the highest.

| MX →  | KF    | CsF   | LiCl  | CuCl  | ZnS   | C <sub>70</sub> |
|-------|-------|-------|-------|-------|-------|-----------------|
| PBE0  | 0.037 | 0.014 | 0.027 | 0.020 | 0.029 | 0.007           |
| M06   | 0.040 | 0.014 | 0.030 | 0.036 | 0.025 | 0.009           |
| TPSSh | 0.051 | 0.018 | 0.099 | 0.018 | 0.030 | 0.010           |
| TPSS  | 0.055 | 0.026 | 0.082 | 0.021 | 0.034 | 0.021           |
| ωB97X | 0.035 | 0.018 | 0.104 | 0.032 | 0.055 | 0.015           |
| PBE   | 0.043 | 0.029 | 0.099 | 0.028 | 0.037 | 0.024           |
| BHLYP | 0.047 | 0.026 | 0.090 | 0.040 | 0.057 | 0.020           |
| B3LYP | 0.056 | 0.025 | 0.092 | 0.040 | 0.058 | 0.012           |
| B97D3 | 0.080 | 0.030 | 0.104 | 0.036 | 0.058 | 0.028           |
| BLYP  | 0.076 | 0.048 | 0.106 | 0.054 | 0.067 | 0.039           |

**Table S14:** M–X bond length (in pm) of the test set MX@C<sub>70</sub> systems TS structures optimized using various DFT-D3 functionals with the def2-SVP basis set, and the reference SCS-MP2/def2-TZVP method.

| MX →           | KF           | CsF          | LiCl         | CuCl         | ZnS          | RMSE |
|----------------|--------------|--------------|--------------|--------------|--------------|------|
| <b>SCS-MP2</b> | <b>217.2</b> | <b>228.1</b> | <b>205.3</b> | <b>206.2</b> | <b>203.7</b> |      |
| PBE            | 217.2        | 228.1        | 205.3        | 206.2        | 203.7        | 1.7  |
| M06            | 215.3        | 229.5        | 203.5        | 208.3        | 202.5        | 1.7  |
| TPSS           | 214.7        | 226.9        | 203.7        | 207.6        | 202.0        | 1.9  |
| TPSSh          | 214.7        | 229.3        | 203.4        | 208.2        | 202.0        | 2.1  |
| PBE0           | 213.9        | 228.1        | 203.3        | 207.8        | 201.7        | 2.4  |
| BLYP           | 213.4        | 226.8        | 202.8        | 207.2        | 201.5        | 2.5  |
| B97D3          | 213.5        | 228.5        | 201.9        | 207.1        | 201.5        | 2.5  |
| B3LYP          | 213.8        | 230.5        | 202.7        | 207.0        | 201.2        | 3.0  |
| ωB97X          | 212.5        | 226.5        | 201.8        | 206.5        | 201.0        | 3.1  |
| BHLYP          | 212.7        | 225.9        | 202.0        | 206.3        | 200.1        | 3.8  |



**Table S15:** Distance (in pm) of the uttermost pentagons of the fullerene (longest C–C distance) of the test set MX@C<sub>70</sub> systems TS structures optimized using various DFT-D3 functionals with the def2-SVP basis set, and the reference SCS-MP2/def2-TZVP method.

| MX →           | KF           | CsF          | LiCl         | CuCl         | ZnS          | RMSE |
|----------------|--------------|--------------|--------------|--------------|--------------|------|
| <b>SCS-MP2</b> | <b>788.1</b> | <b>785.5</b> | <b>789.8</b> | <b>789.4</b> | <b>788.7</b> |      |
| BHLYP          | 787.4        | 785.4        | 789.2        | 787.9        | 786.9        | 1.1  |
| PBE0           | 789.5        | 787.4        | 791.0        | 790.3        | 789.1        | 1.3  |
| M06            | 789.5        | 787.0        | 791.2        | 790.3        | 789.7        | 1.3  |
| TPSSh          | 791.8        | 789.9        | 793.3        | 792.7        | 791.3        | 3.5  |
| ωB97X          | 791.0        | 790.0        | 793.6        | 792.8        | 791.8        | 3.6  |
| B3LYP          | 791.9        | 790.4        | 793.8        | 792.7        | 791.4        | 3.8  |
| TPSS           | 793.7        | 792.0        | 795.1        | 794.6        | 793.2        | 5.5  |
| PBE            | 794.4        | 792.5        | 795.8        | 795.3        | 794.1        | 6.2  |
| B97D3          | 795.0        | 793.9        | 796.1        | 795.6        | 794.0        | 6.7  |
| BLYP           | 796.8        | 796.0        | 798.7        | 797.8        | 796.2        | 8.8  |

**Table S16:** Root-mean-square differences of atomic positions (RMSDs in Å) of the test set MX@C<sub>70</sub> systems TS structures optimized using various DFT-D3 functionals with the def2-SVP basis set with respect to the TS geometries optimized at the reference SCS-MP2/def2-TZVP level. The functionals are sorted by the sum of all the RMSD values obtained for each functional from the lowest to the highest.

| MX →  | KF    | CsF   | LiCl  | CuCl  | ZnS   |
|-------|-------|-------|-------|-------|-------|
| PBE0  | 0.125 | 0.011 | 0.009 | 0.009 | 0.010 |
| ωB97X | 0.125 | 0.017 | 0.015 | 0.017 | 0.016 |
| B3LYP | 0.126 | 0.019 | 0.014 | 0.016 | 0.016 |
| BHLYP | 0.126 | 0.020 | 0.020 | 0.025 | 0.021 |
| M06   | 0.146 | 0.017 | 0.010 | 0.008 | 0.034 |
| TPSS  | 0.128 | 0.026 | 0.021 | 0.024 | 0.023 |
| PBE   | 0.127 | 0.029 | 0.026 | 0.027 | 0.026 |
| B97D3 | 0.129 | 0.034 | 0.030 | 0.030 | 0.043 |
| BLYP  | 0.133 | 0.046 | 0.040 | 0.041 | 0.041 |
| TPSSh | 0.126 | 0.016 | 0.012 | 0.223 | 0.014 |

**Table S17:** M–X bond length (in pm) of the test set MX@C<sub>70</sub> systems LM structures optimized using various DFT-D3 functionals with different basis sets (SVP denotes the def2-SVP and TZVP the def2-TZVP basis set).

| MX →           | KF           | CsF          | LiCl         | CuCl         | ZnS          |
|----------------|--------------|--------------|--------------|--------------|--------------|
| <b>SCS-MP2</b> | <b>232.5</b> | <b>246.8</b> | <b>213.4</b> | <b>212.5</b> | <b>209.3</b> |
| PBE0/SVP       | 222.8        | 242.1        | 209.4        | 212.5        | 206.9        |
| PBE0/TZVP      | 224.4        | 239.2        | 209.5        | 209.6        | 206.1        |
| B97D3/SVP      | 217.2        | 241.8        | 206.5        | 212.1        | 207.0        |
| B97D3/TZVP     | 217.7        | 243.4        | 205.2        | 208.6        | 205.4        |
| TPSS/SVP       | 221.5        | 243.6        | 209.2        | 212.4        | 207.4        |
| TPSS/TZVP      | 223.5        | 241.6        | 210.4        | 209.1        | 206.2        |

**Table S18:** Distance (in pm) of the uttermost pentagons of the fullerene (longest C–C distance) of the test set MX@C<sub>70</sub> systems LM structures optimized using three DFT-D3 functionals with different basis sets (SVP denotes the def2-SVP and TZVP the def2-TZVP basis set).

| MX →           | KF           | CsF          | LiCl         | CuCl         | ZnS          | C <sub>70</sub> |
|----------------|--------------|--------------|--------------|--------------|--------------|-----------------|
| <b>SCS-MP2</b> | <b>792.5</b> | <b>794.9</b> | <b>790.9</b> | <b>790.9</b> | <b>789.4</b> | <b>791.8</b>    |
| PBE0/SVP       | 793.1        | 795.0        | 791.6        | 791.9        | 791.2        | 792.2           |
| PBE0/TZVP      | 789.5        | 791.5        | 787.9        | 788.2        | 787.4        | 788.7           |
| B97D3/SVP      | 800.7        | 800.8        | 799.2        | 798.2        | 798.2        | 797.8           |
| B97D3/TZVP     | 796.8        | 796.1        | 795.7        | 794.4        | 794.5        | 794.1           |
| TPSS/SVP       | 798.0        | 799.1        | 796.1        | 795.4        | 795.5        | 796.5           |
| TPSS/TZVP      | 793.9        | 795.4        | 792.3        | 791.6        | 791.8        | 792.8           |

**Table S19:** Root-mean-square differences of atomic positions (RMSDs in Å) of the test set MX@C<sub>70</sub> systems LM structures and the empty C<sub>70</sub> geometries optimized using various DFT-D3 functionals with the def2-SVP (denoted as SVP) or the def2-TZVP (denoted as TZVP) basis set with respect to the LM geometries optimized at the reference SCS-MP2/def2-TZVP level.

| MX →       | KF    | CsF   | LiCl  | CuCl  | ZnS   | C <sub>70</sub> |
|------------|-------|-------|-------|-------|-------|-----------------|
| PBE0/SVP   | 0.037 | 0.014 | 0.027 | 0.020 | 0.029 | 0.007           |
| PBE0/TZVP  | 0.027 | 0.023 | 0.021 | 0.022 | 0.033 | 0.022           |
| B97D3/SVP  | 0.080 | 0.030 | 0.104 | 0.036 | 0.058 | 0.028           |
| B97D3/TZVP | 0.061 | 0.014 | 0.105 | 0.025 | 0.055 | 0.011           |
| TPSS/SVP   | 0.055 | 0.026 | 0.082 | 0.021 | 0.034 | 0.021           |
| TPSS/TZVP  | 0.033 | 0.011 | 0.099 | 0.011 | 0.028 | 0.005           |

**Table S20:** Intrinsic switching barriers calculated using different DFT-D3/def2-SVP levels (columns denoted as DFT) and the SCS-MP2/def2-TZVP single-point energies of the DFT-D3/def2-SVP-optimized structures (columns denoted as MP2; all in kcal/mol).

| MX →  | KF   |      | CsF  |      | LiCl |      | CuCl |      | ZnS  |     | RMSE |
|-------|------|------|------|------|------|------|------|------|------|-----|------|
|       | DFT  | MP2  | DFT  | MP2  | DFT  | MP2  | DFT  | MP2  | DFT  | MP2 |      |
| M06   | 16.1 | 19.0 | 39.9 | 42.1 | 3.6  | 2.5  | -0.2 | 1.5  | 2.2  | 3.2 | 1.9  |
| PBE0  | 18.2 | 19.0 | 38.8 | 42.2 | 3.3  | 2.4  | 5.2  | 1.0  | 6.8  | 3.4 | 2.9  |
| TPSSH | 17.8 | 17.5 | 37.0 | 42.3 | 3.5  | 0.8  | 3.6  | 1.1  | 7.5  | 3.4 | 3.4  |
| TPSS  | 17.0 | 17.0 | 35.5 | 42.5 | 3.4  | 2.7  | 1.3  | 1.7  | 6.9  | 3.5 | 3.5  |
| PBE   | 16.4 | 19.0 | 35.3 | 42.4 | 2.1  | 2.2  | -0.6 | 1.7  | 5.0  | 3.4 | 3.6  |
| ωB97X | 20.5 | 19.6 | 44.2 | 42.5 | 5.6  | 1.3  | 9.9  | 0.7  | 8.3  | 2.9 | 5.2  |
| B3LYP | 19.8 | 16.5 | 38.5 | 41.7 | 3.2  | 0.6  | 9.3  | -0.1 | 10.2 | 2.1 | 6.0  |
| BLYP  | 19.6 | 14.0 | 34.9 | 42.0 | 3.6  | 0.2  | 7.1  | -0.2 | 10.8 | 2.1 | 6.7  |
| BHLYP | 20.8 | 18.6 | 42.8 | 41.6 | 3.5  | 1.4  | 13.5 | 0.7  | 10.6 | 2.6 | 6.9  |
| B97D3 | 16.6 | 10.9 | 36.4 | 42.2 | 10.4 | -1.2 | 9.3  | 1.5  | 11.7 | 2.8 | 8.3  |

**Table S21:** Encapsulation energies calculated using different DFT-D3/def2-TZVP methods (columns denoted as DFT) and SCS-MP2/def2-TZVP (counterpoise-corrected) single-point energies of the DFT-D3/def2-SVP-optimized structures (columns denoted as MP2; all in kcal/mol).

| MX →  | KF    |       | CsF   |       | LiCl  |       | CuCl  |       | ZnS   |       | RMSE |
|-------|-------|-------|-------|-------|-------|-------|-------|-------|-------|-------|------|
|       | DFT   | MP2   |      |
| M06   | -34.1 | -27.2 | -22.0 | -26.0 | -35.4 | -31.4 | -36.9 | -29.6 | -34.1 | -39.4 | 5.7  |
| PBE0  | -27.4 | -27.4 | -12.5 | -26.0 | -28.2 | -31.2 | -32.4 | -30.1 | -32.9 | -39.4 | 6.9  |
| TPSSH | -27.3 | -26.3 | -13.0 | -26.5 | -29.4 | -29.7 | -37.7 | -30.4 | -39.4 | -39.8 | 6.9  |
| BHLYP | -31.6 | -26.4 | -13.5 | -24.9 | -28.9 | -29.7 | -33.6 | -29.1 | -29.7 | -38.3 | 7.1  |
| TPSS  | -25.7 | -26.3 | -10.1 | -27.1 | -30.1 | -31.4 | -37.2 | -30.7 | -37.9 | -40.1 | 8.2  |
| B3LYP | -31.4 | -25.7 | -10.7 | -26.2 | -30.5 | -29.3 | -36.1 | -29.3 | -30.9 | -38.8 | 8.7  |
| ωB97X | -39.5 | -27.7 | -27.5 | -26.1 | -38.9 | -29.8 | -46.5 | -28.2 | -45.4 | -38.4 | 11.0 |
| BLYP  | -30.9 | -25.0 | -5.5  | -27.4 | -32.9 | -29.3 | -37.9 | -29.6 | -31.5 | -39.4 | 11.5 |
| PBE   | -23.9 | -27.8 | -5.7  | -27.3 | -25.6 | -31.3 | -28.1 | -30.6 | -25.7 | -40.2 | 12.1 |
| B97D3 | -2.7  | -23.5 | 41.5  | -26.8 | -35.7 | -28.0 | -41.5 | -30.3 | -37.5 | -39.3 | 32.5 |

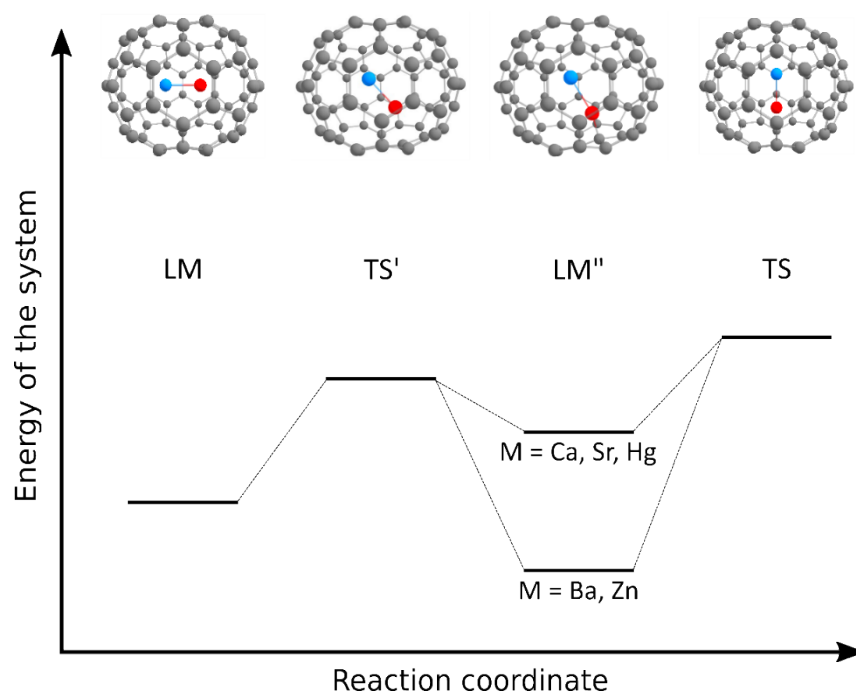

**Figure S4:** A schematical representation of the potential energy surface (PES) of  $\text{MO}@C_{70}$  ( $M = \text{Ca}, \text{Sr}, \text{Ba}, \text{Zn}, \text{Hg}$ ) with the usual local minimum (LM), additional transition state ( $\text{TS}'$ ), additional local minimum ( $\text{LM}''$ ), and the transition state (TS). Oxygen atom is in red, metal atom is in blue.

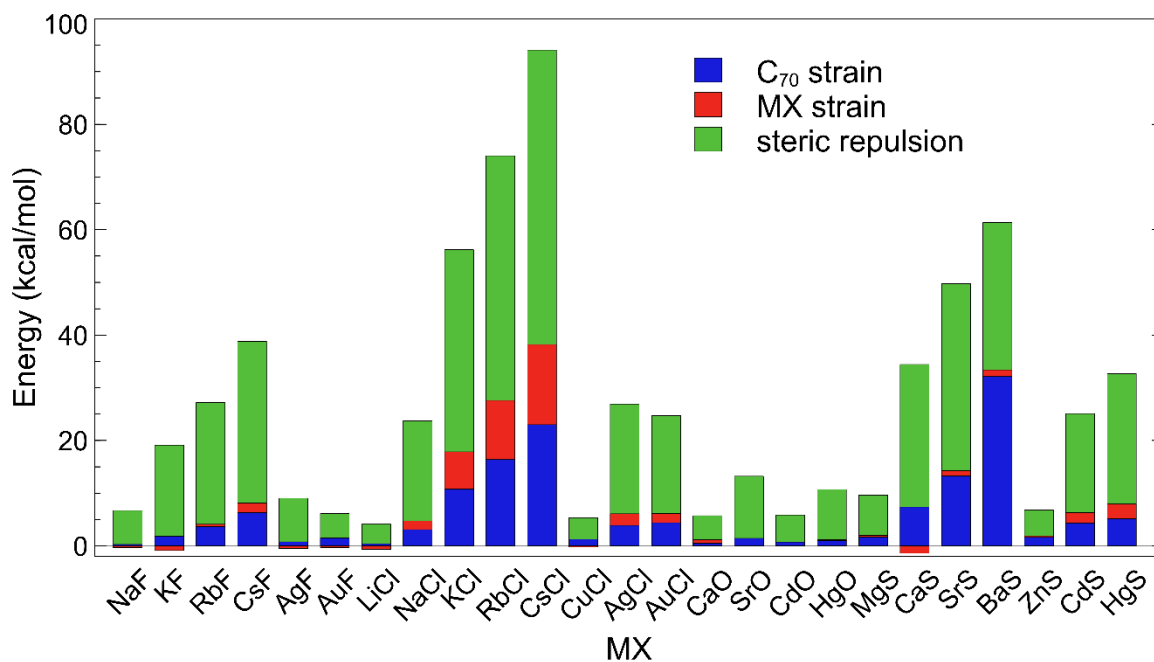

**Figure S5:** Contributions to intrinsic switching barriers divided into steric repulsion, and strain of MX and  $C_{70}$ , which was calculated as the difference between the energy of the  $\text{MX}/C_{70}$  in the TS and LM geometries.

**Table S22:** Properties of MX@C<sub>70</sub> systems and the free MX: M–X bond lengths ( $r_{M-X}$ ), dipole moments ( $\mu$ ), and encapsulation energies (EE); calculated at the PBE0-D3/def2-SVP level (EEs calculated with the def2-TZVP basis set as described in the main text).

| MX   | $r_{M-X}$ in MX@C <sub>70</sub><br>(pm) | $r_{M-X}$ in MX<br>(pm) | $\mu$ in MX@C <sub>70</sub><br>(Debye) | $\mu$ in MX<br>(Debye) | EE<br>(kcal/mol) |
|------|-----------------------------------------|-------------------------|----------------------------------------|------------------------|------------------|
| NaF  | 194.8                                   | 188.9                   | 2.00                                   | 7.32                   | -31.7            |
| KF   | 222.8                                   | 214.0                   | 2.21                                   | 7.79                   | -27.4            |
| RbF  | 235.4                                   | 230.1                   | 2.39                                   | 8.42                   | -23.2            |
| CsF  | 242.1                                   | 239.4                   | 2.29                                   | 7.69                   | -12.5            |
| AgF  | 202.6                                   | 197.4                   | 1.70                                   | 5.33                   | -32.6            |
| AuF  | 197.5                                   | 193.5                   | 1.34                                   | 4.02                   | -30.4            |
| LiCl | 208.9                                   | 200.4                   | 1.76                                   | 6.59                   | -28.5            |
| NaCl | 237.0                                   | 234.0                   | 2.32                                   | 8.22                   | -27.0            |
| KCl  | 257.5                                   | 265.8                   | 2.50                                   | 9.61                   | -11.6            |
| RbCl | 264.7                                   | 281.9                   | 2.53                                   | 10.36                  | 4.4              |
| CsCl | 269.4                                   | 294.1                   | 2.46                                   | 9.96                   | 26.0             |
| CuCl | 212.5                                   | 208.3                   | 1.72                                   | 5.33                   | -32.4            |
| AgCl | 228.6                                   | 230.2                   | 1.84                                   | 5.32                   | -24.8            |
| AuCl | 223.1                                   | 225.4                   | 1.42                                   | 3.61                   | -23.0            |
| CaO  | 185.9                                   | 180.3                   | 2.65                                   | 8.40                   | -37.7            |
| SrO  | 199.9                                   | 195.2                   | 2.96                                   | 8.65                   | -34.1            |
| CdO  | 191.1                                   | 189.4                   | 2.01                                   | 5.42                   | -33.1            |
| HgO  | 191.6                                   | 190.6                   | 1.61                                   | 4.48                   | -36.4            |
| MgS  | 218.0                                   | 215.7                   | 3.24                                   | 7.51                   | -40.9            |
| CaS  | 239.5                                   | 229.9                   | 3.45                                   | 9.92                   | -37.6            |
| SrS  | 250.3                                   | 244.9                   | 3.60                                   | 10.37                  | -25.0            |
| BaS  | 256.1                                   | 257.5                   | 3.41                                   | 10.29                  | -4.5             |
| ZnS  | 206.9                                   | 205.4                   | 2.42                                   | 5.83                   | -32.8            |
| CdS  | 222.3                                   | 224.6                   | 2.44                                   | 5.61                   | -24.1            |
| HgS  | 221.8                                   | 227.5                   | 1.80                                   | 4.40                   | -24.9            |

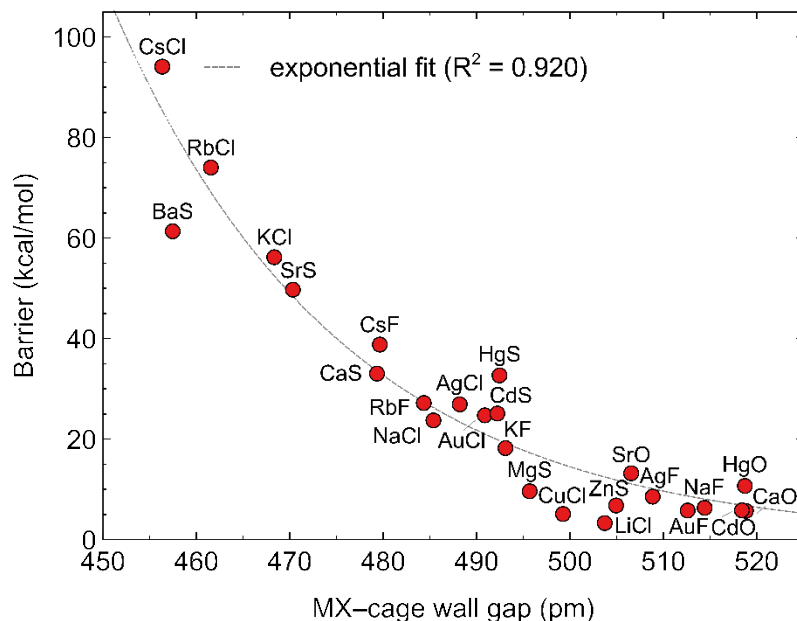

**Figure S6:** The correlation between the intrinsic switching barrier the difference of the empty  $C_{70}$  cage width and the M–X bond length in the TS geometry (MX–cage wall gap).

**Table S23:** Switching barriers calculated employing total energies ( $SB_0$ ) and enthalpies at 298.15 K ( $SB_{298}$ , both in kcal/mol) for denoted  $MX@C_{70}$  systems at different electric fields (EF in V/Å).

| EF → | 0.00   |            | 0.21   |            | 0.41   |            | 0.62   |            | 0.82   |            | 1.03   |            |
|------|--------|------------|--------|------------|--------|------------|--------|------------|--------|------------|--------|------------|
| MX   | $SB_0$ | $SB_{298}$ |
| NaF  | 6.3    | 5.6        | 3.8    | 4.5        | 2.2    | 2.8        | 0.9    | 1.5        | –      | –          | –      | –          |
| KF   | 18.2   | 17.6       | 15.5   | 16.1       | 13.5   | 14.1       | 11.8   | 12.3       | 10.2   | 10.7       | 8.8    | 9.3        |
| RbF  | 27.2   | 26.1       | 23.9   | 24.9       | 21.8   | 22.7       | 19.8   | 20.7       | 18.1   | 18.9       | 16.6   | 17.3       |
| CsF  | 38.8   | 37.4       | 35.2   | 36.6       | 33.2   | 34.5       | 31.3   | 32.6       | 29.6   | 30.9       | 28.2   | 29.4       |
| AgF  | 8.6    | 7.5        | 5.9    | 6.9        | 4.5    | 5.5        | 3.2    | 4.2        | 1.5    | 2.4        | –      | 0.7        |
| AuF  | 5.8    | 4.7        | 3.4    | 4.5        | 2.8    | 3.8        | 0.9    | 2.0        | –      | 0.7        | –      | 0.2        |

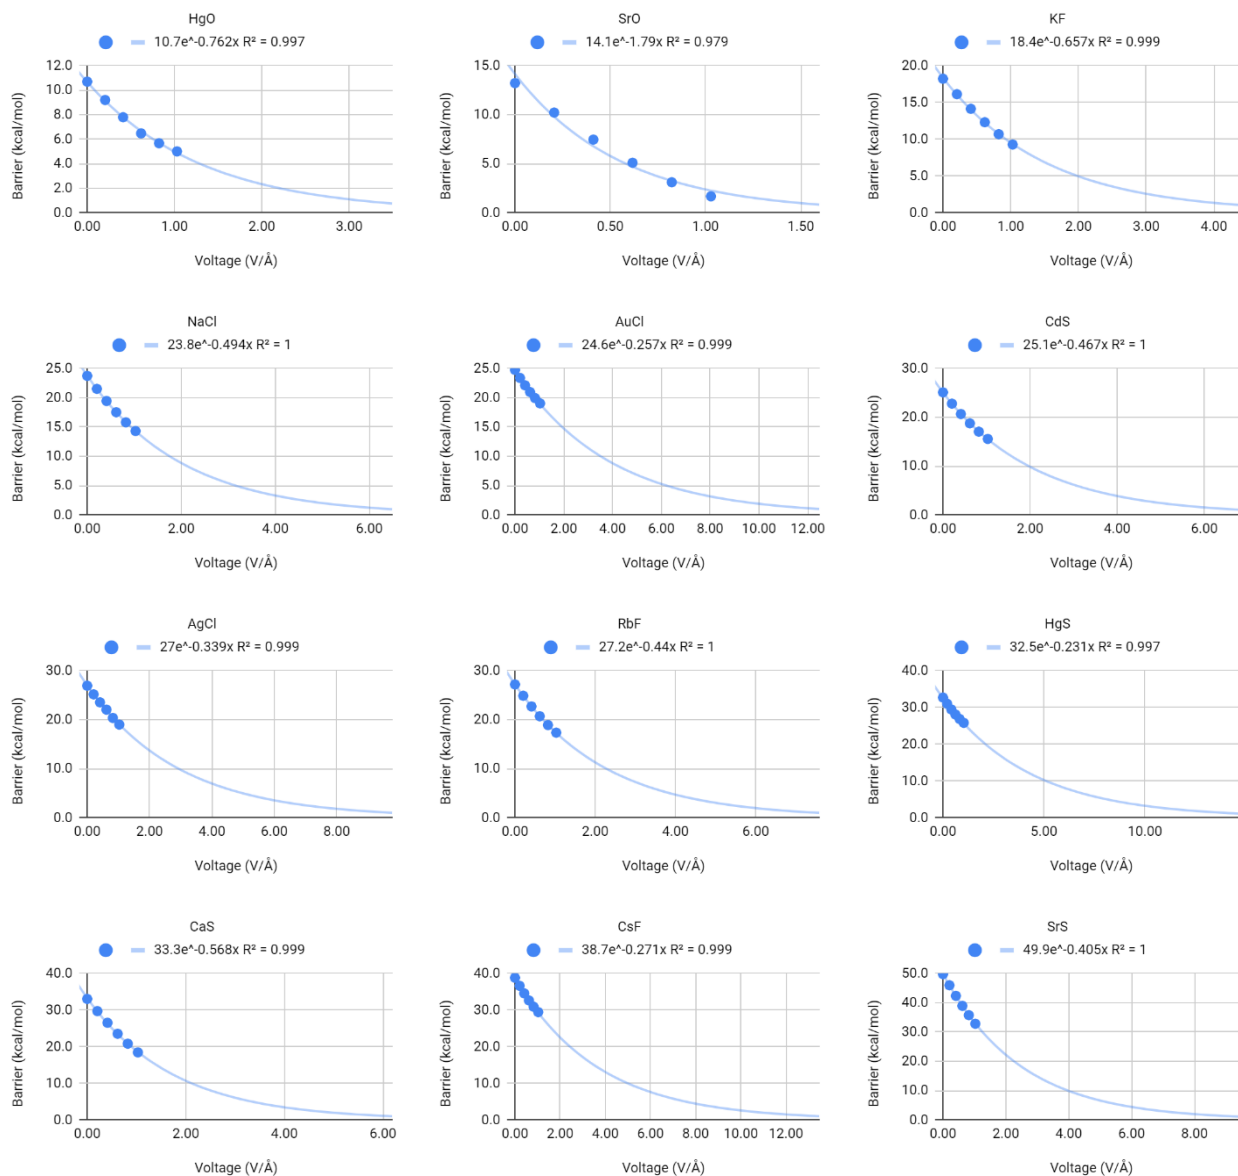

**Figure S7:** Extrapolations of the switching function (barrier-voltage dependence) of systems with intrinsic switching barrier between 10 and 50 kcal/mol. The blue points represent the barriers that were calculated at the PBE0-D3/def2-SVP level.

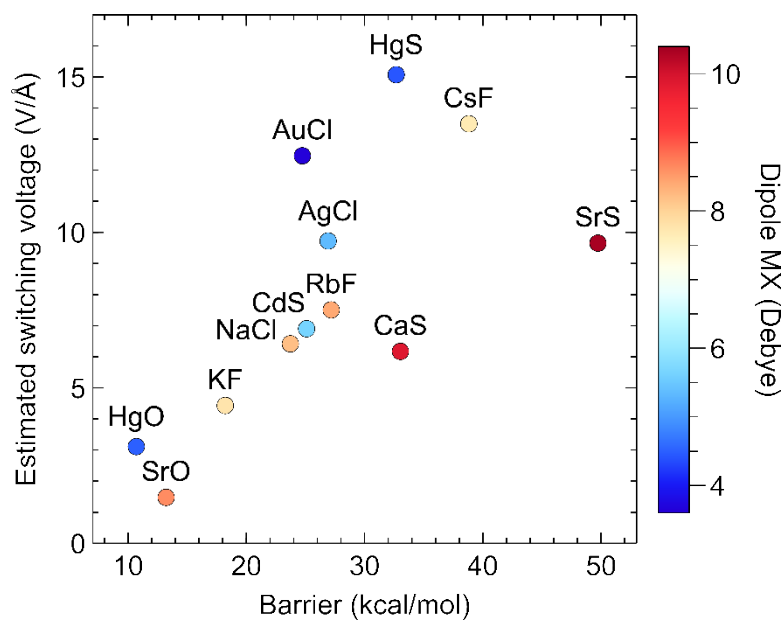

**Figure S8:** The correlation between the switching barrier, the estimated switching voltage, and the dipole moment of the free MX.

## References

1. Helgaker T, Klopper W, Koch H, Noga J. Basis-set convergence of correlated calculations on water. *J Chem Phys.* 1997 Jun 15;106(23):9639–46.
